# Supplementary material for: Optimal Intervention Policies for Total Joint Replacement Postoperative Care Process
Source: Atypon-hosted journal article supplement (doi:10.1287/msom.2020.0950), 2021-02-17
Supplement: msom.2020.0950.sm1.pdf [file msom.2020.0950.sm1.pdf]

# Optimal Intervention Policies for TJR Postoperative Care Process: Online Supplement

---

**Lemma 1.** Given Assumption 4.5, for any  $f(s)$  that is nondecreasing in  $s$ , the following holds:

$$\sum_{s' \in \mathbb{S}} p_t(s'|s) f(s') \leq \sum_{s' \in \mathbb{S}} p_{t+1}(s'|s) f(s').$$

*Proof of Lemma 1.* By the definition of probability function, the following holds true:

$$\sum_{s'=0}^S p_t(s'|s) = \sum_{s'=0}^S p_{t+1}(s'|s) = 1.$$

Let  $A = \sum_{s'=0}^S p_{t+1}(s'|s) - \sum_{s'=0}^S p_t(s'|s) = 0$ . Then,

$$\begin{aligned} A &= \left\{ \sum_{s'=0}^S p_{t+1}(s'|s) - \sum_{s'=0}^S p_t(s'|s) \right\} f(0) \\ &\leq p_{t+1}(0|s) f(0) - p_t(0|s) f(0) + \left\{ \sum_{s'=1}^S p_{t+1}(s'|s) - \sum_{s'=1}^S p_t(s'|s) \right\} f(1) \\ &\leq \sum_{s'=0}^1 p_{t+1}(s'|s) f(s') - \sum_{s'=0}^1 p_t(s'|s) f(s') + \left\{ \sum_{s'=2}^S p_{t+1}(s'|s) - \sum_{s'=2}^S p_t(s'|s) \right\} f(2), \end{aligned}$$

since  $f(s)$  is a nondecreasing function in  $s$ .

Continue in a similar fashion until we arrive at the following:

$$A \leq \sum_{s'=0}^S p_{t+1}(s'|s) f(s') - \sum_{s'=0}^S p_t(s'|s) f(s').$$

Since by definition  $A = 0$ , we have

$$0 \leq \sum_{s'=0}^S p_{t+1}(s'|s) f(s') - \sum_{s'=0}^S p_t(s'|s) f(s').$$

Hence,  $\sum_{s'=0}^S p_t(s'|s) f(s') \leq \sum_{s'=0}^S p_{t+1}(s'|s) f(s')$ .

---

**Proposition 2.** Given Assumptions 4.1-4.5,  $v_t(s_t)$  is nondecreasing in  $t$  for all  $s_t \in \mathbb{S}$ .

*Proof of Proposition 2.* We use backward induction to prove the proposition.

Step 1: Show true for  $t = T$ .

$$v_T(s) = r_T(s, a) \geq 0 \geq v_{T-1}(s).$$

For  $t \in \{0, 1, \dots, T-1\}$ ,  $v_t(s)$  only consists of costs that are all negative values, hence  $v_t(s) \leq 0$  always holds true.

Step 2: Suppose true for  $t = k+1$ .

$$v_{k+1}(s) \geq v_k(s).$$

Step 3: Show true for  $t = k$ .

$$\begin{aligned} v_k(s) &= \max \left\{ r_k(s, a) + \sum_{s' \in S} p_k^a(s'|s) v_{k+1}(s') \right\} \\ &\geq \max \left\{ r_{k-1}(s, a) + \sum_{s' \in S} p_{k-1}^a(s'|s) v_{k+1}(s') \right\} \quad (\text{P2.1}) \end{aligned}$$

$$\geq \max \left\{ r_{k-1}(s, a) + \sum_{s' \in S} p_{k-1}^a(s'|s) v_k(s') \right\} \quad (\text{P2.2})$$

$$= v_{k-1}(s),$$

where (P2.1) holds due to Assumption 4.4, Proposition 1 and Lemma 1, while (P2.2) holds true due to induction hypothesis that  $v_{k+1}(s) \geq v_k(s)$ . Hence,  $v_{t+1}(s) \geq v_t(s)$  holds true for all  $t$ .
